# Supplementary material for: Electrochemically Oxidized Carbon Nanotube Sheets for High-Performance and Flexible-Film Supercapacitors
Source: MDPI journal article supplement (doi:10.3390/nano13202814), 2023-10-23
Supplement: s1 [file s1]

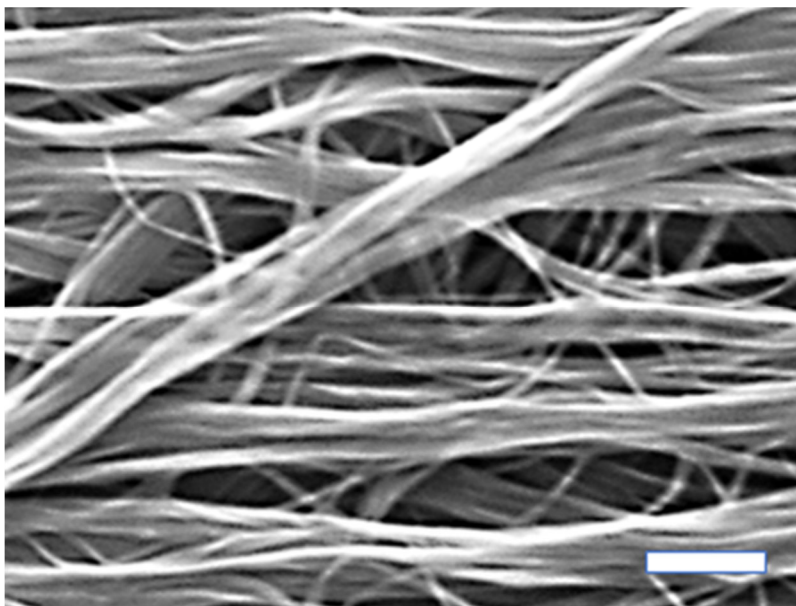

**Figure S1.** A scanning electron microscopy (SEM) image of carbon nanotube (CNT) sheets after electrochemical oxidation treatment (EOT) (scale bar = 200nm).

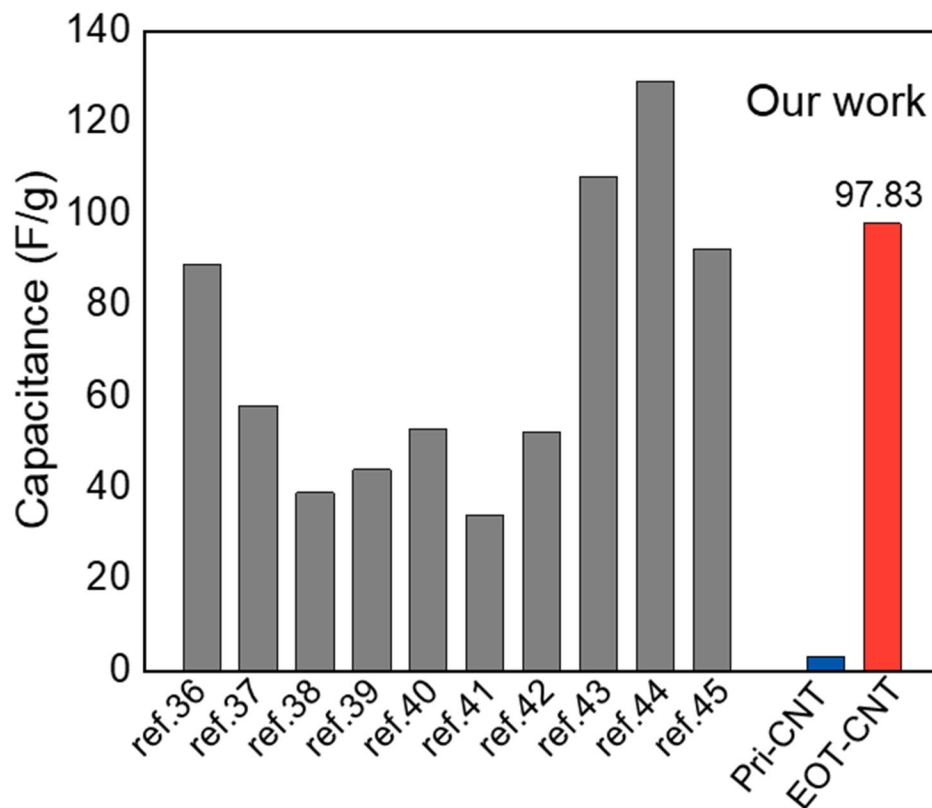

**Figure S2.** Capacitance comparison of the EOT CNT supercapacitor in the present work with previously reported CNT-based ones.

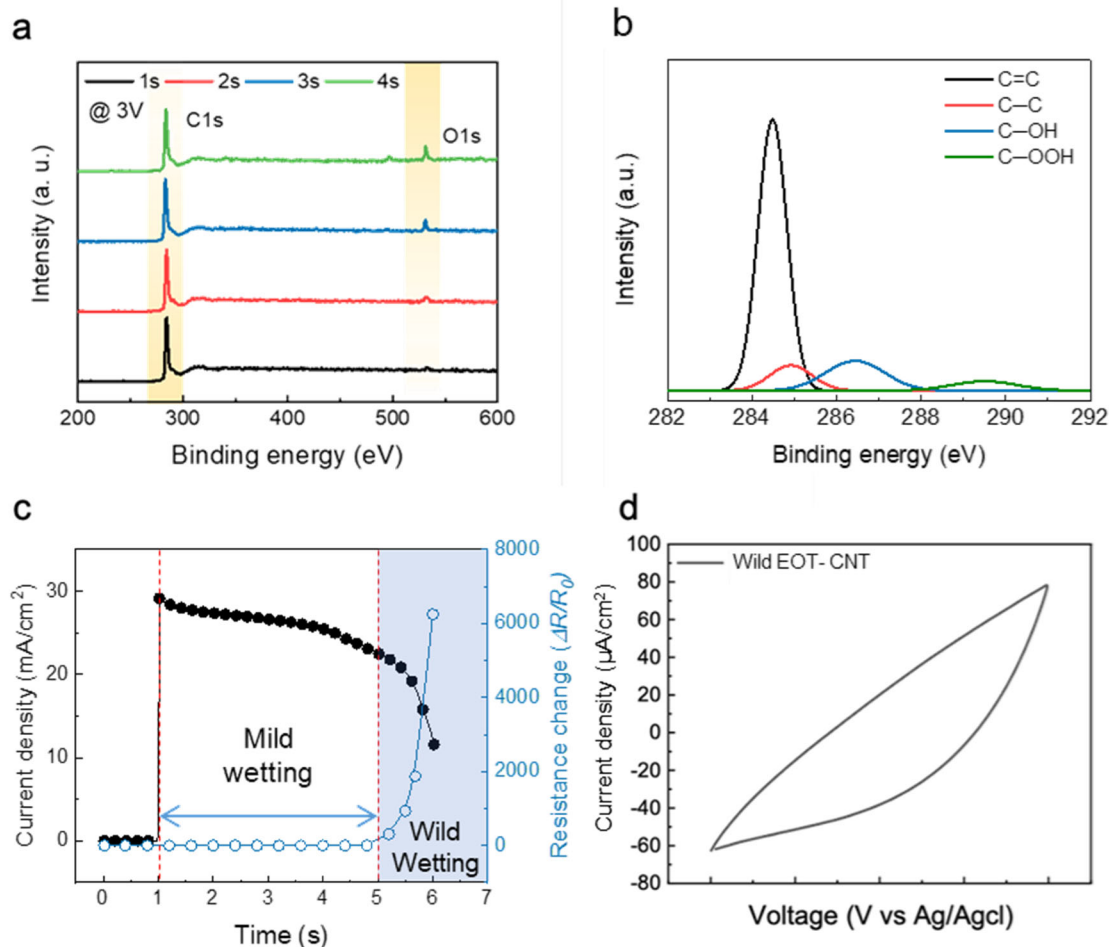

**Figure S3.** (a) An X-ray photoelectron spectroscopy (XPS) spectrum for EOT CNT sheet electrodes fabricated over various EOT times. (b) Deconvoluted C 1s XPS spectrum showing various functional groups. (c) Measured current density and resistance change of the EOT CNT working electrode versus EOT time (the mild and wild wetting regions are indicated). (d) Cyclic voltammetry (CV) curves of the wild-wetted CNT electrode.

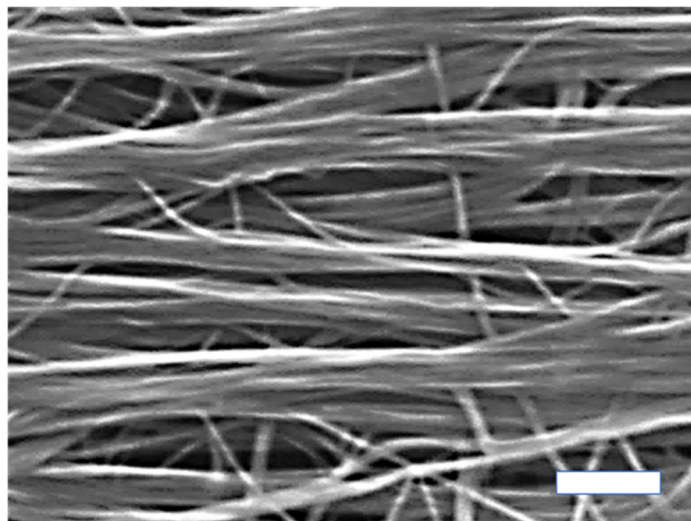

**Figure S4.** SEM images of the CNT working electrode after the 1000 bending cycle (scale bars = 200nm).
